# Supplementary material for: Sensitivity and specificity of loss of heterozygosity analysis for the classification of rare germline variants in BRCA1/2: results of the observational AGO-TR1 study (NCT02222883)
Source: PubMed Central journal article supplement — J Med Genet. 2020 Dec 3;59(3):248–52. doi: 10.1136/jmedgenet-2020-107353 (PMC8867275; doi:10.1136/jmedgenet-2020-107353), 2020-12-03
Supplement: jmedgenet-2020-107353supp001.pdf [file jmedgenet-2020-107353supp001.pdf]

## **Sensitivity and specificity of loss of heterozygosity analysis for the classification of rare germline variants in *BRCA1/2*: Results of the observational AGO-TR1 study (NCT02222883)**

### **Supplementary Materials and Methods**

#### **DNA isolation from FFPE tumor samples**

Tumour areas containing >80% tumour nuclei were chosen for DNA isolation, macrodissected from unstained 10 µm sections, and incubated in the presence of 1ml limonene (30 min, 60°C, 1,000 rpm). Deparaffinized tissues were rehydrated (consecutive washing with 98% and 70% ethanol) and incubated (8 h, 60°C) in 200 µl of lysis buffer (50 mM Tris-HCl, pH 8.4, 1 mM EDTA, 0.5% [v/v] Tween®20 and 2 mg/ml proteinase K [Carl Roth, Karlsruhe, Germany]). Another 20 µl of Proteinase K (20 mg/ml) was added. Following incubation (16 h, 60°C, 1,000 rpm), 200 µl of tissue lysate was mixed with 250 µl of binding buffer (6 M guanidinium thiocyanate, 0.1 M Tris, pH 7.5), 250 µl of ethanol, transferred onto a NucleoSpin Extract II spin column (Macherey & Nagel, Dueren, Germany), and centrifuged (3 min, 14,000x g). The bound DNA was washed twice with 700 µl of wash buffer (150 mM Tris pH 7.4, 85% ethanol). The wash buffer was removed (1 min, 14,000x g). A total of 50 µl of water was added, incubated for 1 min, and the DNA was eluted (1 min, 14,000x g). The DNA concentration was quantified using a Nanodrop® ND-1000 photometer (NanoDrop Technologies, Wilmington, DE, USA).

**Supplementary Figure 1: A)** Rare *BRCA1/2* germline variants identified in the overall study sample of 488 patients with OC. The majority of individuals (307, 62.9%) carried no rare germline variant in the *BRCA1/2* genes; 157 individuals carried one (32.2%), 21 individuals carried two (4.3%), and three individuals carried three rare germline variants (0.6%). **B)** *BRCA1/2* genotypes of the 181 patients with rare *BRCA1/2* variants. 79 patients carried class 4/5 variants only. Of those, one patient carried a combination of one *BRCA1* and one *BRCA2* class 4/5 variant. 13 patients carried one class 4/5 *BRCA1/2* variant in addition to one class 1/2 variant; another patient carried one class 4/5 variant, one class 3, and one class 1/2 variant. 67 patients carried class 1/2 variants only (60 with one variant, five with two, and two with three variants). 21 patients carried class 3 variants only (19 with one variant and two with two variants).

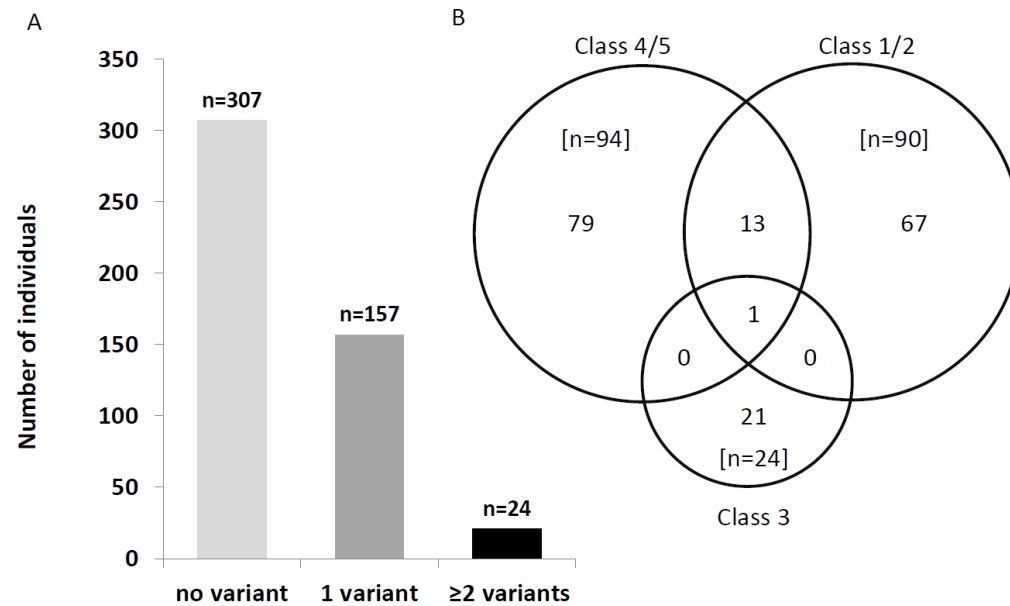

**Supplementary Table 1:** Characteristics of the 488 individuals with ovarian cancer included in this investigation. Of the 488 patients, 266 were enrolled at primary diagnosis of ovarian cancer and 222 were enrolled with recurrent ovarian cancer.

|                                                              |                       |
|--------------------------------------------------------------|-----------------------|
| <b>Age at ovarian cancer diagnosis (mean, range)</b>         | 58 years, 16–93 years |
| <b>Histological subtypes (% of the overall study sample)</b> |                       |
| - High grade serous                                          | 382 (78.3)            |
| - High grade endometrioid                                    | 22 (4.5)              |
| - Serous/papillary, grade unknown                            | 20 (4.1)              |
| - Low grade serous                                           | 17 (3.5)              |
| - Mucinous                                                   | 8 (1.6)               |
| - Low grade endometrioid                                     | 7 (1.4)               |
| - Clear cell                                                 | 6 (1.2)               |
| - Other/unspecified                                          | 19 (3.9)              |
| - Missing                                                    | 7 (1.4)               |
| <b>Tumour grade (% of the overall study sample)</b>          |                       |
| - G1                                                         | 29 (5.9)              |
| - G2                                                         | 69 (14.1)             |
| - G3                                                         | 355 (72.7)            |
| - G4                                                         | 6 (1.2)               |
| - Not specified                                              | 29 (5.9)              |

**Supplementary Table 2:** Rare germline variants in the *BRCA1* and *BRCA2* genes observed in 488 OC patients. For each variant, the results of paired NGS analyses of the DNA sample derived from blood and the DNA sample derived from the corresponding tumour are shown, i.e. the number of reads showing the variant allele and the number of reads showing reference allele. ExAC % = Frequency of the germline variant in percent according to the Exome Aggregation Consortium (ExAC) in a dataset of individuals of European, non-Finnish ancestry, excluding samples from The Cancer Genome Atlas (TCGA). This dataset comprises a total of 27,173 samples that were analyzed by whole-exome sequencing. \* = Fisher's Exact test was applied to assess the significance level of deviating variant fractions in blood vs tumour samples, with p values <0.05 considered significant after correction for multiple testing using the Benjamini-Hochberg approach.

| ID                        | Chromosome | Position | Gene         | Transcript  | cHGVS          | pHGVS               | ExAC % | Variant allele blood | Reference allele blood | Variant fraction blood | Variant allele tumour | Reference allele tumour | Variant fraction tumour | Fold change | P-Value * |
|---------------------------|------------|----------|--------------|-------------|----------------|---------------------|--------|----------------------|------------------------|------------------------|-----------------------|-------------------------|-------------------------|-------------|-----------|
| <b>Class 4/5 variants</b> |            |          |              |             |                |                     |        |                      |                        |                        |                       |                         |                         |             |           |
| P32                       | 17         | 41245210 | <i>BRCA1</i> | NM_007294.3 | c.2338C>T      | p.(Gln780*)         | 0.0000 | 507                  | 507                    | 0.50                   | 643                   | 71                      | 0.90                    | 1.80        | 0.00000   |
| P51                       | 17         | 41223242 | <i>BRCA1</i> | NM_007294.3 | c.4689C>G      | p.(Tyr1563*)        | 0.0000 | 409                  | 480                    | 0.46                   | 685                   | 121                     | 0.85                    | 1.85        | 0.00000   |
| P48                       | 17         | 41226488 | <i>BRCA1</i> | NM_007294.3 | c.4533_4534del | p.(His1511Glnfs*)   | 0.0000 | 256                  | 288                    | 0.47                   | 1363                  | 260                     | 0.84                    | 1.79        | 0.00000   |
| P63                       | 17         | 41209079 | <i>BRCA1</i> | NM_007294.3 | c.5266dup      | p.(Gln1756Profs*74) | 0.0166 | 258                  | 315                    | 0.45                   | 593                   | 139                     | 0.81                    | 1.80        | 0.00000   |

|      |    |          |       |             |                |                     |        |     |     |      |      |     |      |      |         |
|------|----|----------|-------|-------------|----------------|---------------------|--------|-----|-----|------|------|-----|------|------|---------|
| P60  | 17 | 41215362 | BRCA1 | NM_007294.3 | c.5177_5180del | p.(Arg1726Lysfs*3)  | 0.0000 | 212 | 269 | 0.44 | 602  | 150 | 0.80 | 1.82 | 0.00000 |
| P476 | 13 | 32905140 | BRCA2 | NM_000059.3 | c.771_775del   | p.(Asn257fs)        | 0.0000 | 243 | 310 | 0.44 | 300  | 53  | 0.85 | 1.93 | 0.00000 |
| P42  | 17 | 41243843 | BRCA1 | NM_007294.3 | c.3700_3704del | p.(Val1234fs)       | 0.0000 | 446 | 523 | 0.46 | 562  | 177 | 0.76 | 1.65 | 0.00000 |
| P54  | 17 | 41222994 | BRCA1 | NM_007294.3 | c.4936del      | p.(Val1646Serfs*12) | 0.0000 | 294 | 306 | 0.49 | 633  | 148 | 0.81 | 1.65 | 0.00000 |
| P31  | 17 | 41245210 | BRCA1 | NM_007294.3 | c.2338C>T      | p.(Gln780*)         | 0.0000 | 304 | 329 | 0.48 | 1091 | 364 | 0.75 | 1.56 | 0.00000 |
| P30  | 17 | 41245591 | BRCA1 | NM_007294.3 | c.1953_1956del | p.(Lys653fs)        | 0.0000 | 520 | 611 | 0.46 | 397  | 125 | 0.76 | 1.65 | 0.00000 |
| P26  | 17 | 41245861 | BRCA1 | NM_007294.3 | c.1687C>T      | p.(Gln563*)         | 0.0074 | 340 | 353 | 0.49 | 594  | 168 | 0.78 | 1.59 | 0.00000 |
| P84  | 13 | 32912940 | BRCA2 | NM_000059.3 | c.4449del      | p.(Asp1484fs)       | 0.0000 | 134 | 139 | 0.49 | 612  | 108 | 0.85 | 1.73 | 0.00000 |
| P44  | 17 | 41243776 | BRCA1 | NM_007294.3 | c.3770_3771del | p.(Glu1257fs)       | 0.0018 | 281 | 316 | 0.47 | 335  | 79  | 0.81 | 1.72 | 0.00000 |
| P65  | 17 | 41209079 | BRCA1 | NM_007294.3 | c.5266dup      | p.(Gln1756Profs*74) | 0.0166 | 431 | 505 | 0.46 | 460  | 161 | 0.74 | 1.61 | 0.00000 |
| P10  | 17 | 41276080 | BRCA1 | NM_007294.3 | c.34C>T        | p.(Gln12*)          | 0.0000 | 110 | 110 | 0.50 | 482  | 66  | 0.88 | 1.76 | 0.00000 |
| P27  | 17 | 41245861 | BRCA1 | NM_007294.3 | c.1687C>T      | p.(Gln563*)         | 0.0074 | 282 | 319 | 0.47 | 487  | 154 | 0.76 | 1.62 | 0.00000 |
| P18  | 17 | 41258504 | BRCA1 | NM_007294.3 | c.181T>G       | p.(Cys61Gly)        | 0.0056 | 146 | 179 | 0.45 | 220  | 36  | 0.86 | 1.91 | 0.00000 |
| P95  | 13 | 32936830 | BRCA2 | NM_000059.3 | c.7976G>A      | p.(Arg2659Lys)      | 0.0000 | 175 | 189 | 0.48 | 483  | 121 | 0.80 | 1.67 | 0.00000 |
| P24  | 17 | 41246355 | BRCA1 | NM_007294.3 | c.1193C>G      | p.(Ser398*)         | 0.0000 | 290 | 314 | 0.48 | 494  | 165 | 0.75 | 1.56 | 0.00000 |
| P19  | 17 | 41258473 | BRCA1 | NM_007294.3 | c.212G>C       | p.(Arg71Thr)        | 0.0000 | 190 | 206 | 0.48 | 183  | 27  | 0.87 | 1.81 | 0.00000 |
| P90  | 13 | 32914174 | BRCA2 | NM_000059.3 | c.5682C>G      | p.(Tyr1894*)        | 0.0000 | 219 | 228 | 0.49 | 288  | 63  | 0.82 | 1.67 | 0.00000 |
| P57  | 17 | 41215957 | BRCA1 | NM_007294.3 | c.5084_5085del | p.(Phe1695Cysfs*3)  | 0.0000 | 109 | 118 | 0.48 | 553  | 121 | 0.82 | 1.71 | 0.00000 |
| P37  | 17 | 41244280 | BRCA1 | NM_007294.3 | c.3268C>T      | p.(Gln1090*)        | 0.0000 | 238 | 238 | 0.50 | 462  | 138 | 0.77 | 1.54 | 0.00000 |
| P16  | 17 | 41258504 | BRCA1 | NM_007294.3 | c.181T>G       | p.(Cys61Gly)        | 0.0056 | 99  | 162 | 0.38 | 315  | 117 | 0.73 | 1.92 | 0.00000 |
| P68  | 17 | 41209079 | BRCA1 | NM_007294.3 | c.5266dup      | p.(Gln1756Profs*74) | 0.0166 | 106 | 141 | 0.43 | 224  | 53  | 0.81 | 1.88 | 0.00000 |
| P92  | 13 | 32914437 | BRCA2 | NM_000059.3 | c.5946del      | p.(Ser1982fs)       | 0.0388 | 225 | 217 | 0.51 | 138  | 17  | 0.89 | 1.75 | 0.00000 |
| P21  | 17 | 41256182 | BRCA1 | NM_007294.3 | c.397del       | p.(Arg133fs)        | 0.0000 | 297 | 309 | 0.49 | 366  | 122 | 0.75 | 1.53 | 0.00000 |
| P40  | 17 | 41244056 | BRCA1 | NM_007294.3 | c.3481_3491del | p.(Glu1161fs)       | 0.0000 | 244 | 453 | 0.35 | 221  | 130 | 0.63 | 1.80 | 0.00000 |
| P53  | 17 | 41222997 | BRCA1 | NM_007294.3 | c.4932_4933dup | p.(Arg1645Lysfs*14) | 0.0000 | 435 | 490 | 0.47 | 402  | 181 | 0.69 | 1.47 | 0.00000 |
| P29  | 17 | 41245504 | BRCA1 | NM_007294.3 | c.2043dup      | p.(Asn682fs)        | 0.0000 | 110 | 140 | 0.44 | 623  | 230 | 0.73 | 1.66 | 0.00000 |
| P96  | 13 | 32954272 | BRCA2 | NM_000059.3 | c.9253dup      | p.(Thr3085fs)       | 0.0000 | 254 | 350 | 0.42 | 151  | 50  | 0.75 | 1.79 | 0.00000 |
| P17  | 17 | 41258504 | BRCA1 | NM_007294.3 | c.181T>G       | p.(Cys61Gly)        | 0.0056 | 68  | 95  | 0.42 | 177  | 42  | 0.81 | 1.93 | 0.00000 |
| P82  | 13 | 32912337 | BRCA2 | NM_000059.3 | c.3847_3848del | p.(Val1283fs)       | 0.0225 | 202 | 246 | 0.45 | 407  | 183 | 0.69 | 1.53 | 0.00000 |

|      |    |          |       |             |                |                     |        |     |     |      |     |     |      |      |         |
|------|----|----------|-------|-------------|----------------|---------------------|--------|-----|-----|------|-----|-----|------|------|---------|
| P79  | 13 | 32911322 | BRCA2 | NM_000059.3 | c.2830A>T      | p.(Lys944*)         | 0.0000 | 273 | 296 | 0.48 | 113 | 23  | 0.83 | 1.73 | 0.00000 |
| P59  | 17 | 41215391 | BRCA1 | NM_007294.3 | c.5153-2del    | p.(?)               | 0.0000 | 128 | 163 | 0.44 | 325 | 127 | 0.72 | 1.64 | 0.00000 |
| P94  | 13 | 32936731 | BRCA2 | NM_000059.3 | c.7877G>A      | p.(Trp2626*)        | 0.0000 | 324 | 324 | 0.50 | 464 | 199 | 0.70 | 1.40 | 0.00000 |
| P73  | 17 | 41209079 | BRCA1 | NM_007294.3 | c.5266dup      | p.(Gln1756Profs*74) | 0.0166 | 400 | 451 | 0.47 | 414 | 213 | 0.66 | 1.40 | 0.00000 |
| P50  | 17 | 41223242 | BRCA1 | NM_007294.3 | c.4689C>G      | p.(Tyr1563*)        | 0.0000 | 251 | 241 | 0.51 | 167 | 44  | 0.79 | 1.55 | 0.00000 |
| P67  | 17 | 41209079 | BRCA1 | NM_007294.3 | c.5266dup      | p.(Gln1756Profs*74) | 0.0166 | 220 | 268 | 0.45 | 491 | 264 | 0.65 | 1.44 | 0.00000 |
| P91  | 13 | 32914437 | BRCA2 | NM_000059.3 | c.5946del      | p.(Ser1982fs)       | 0.0388 | 464 | 503 | 0.48 | 539 | 303 | 0.64 | 1.33 | 0.00000 |
| P33  | 17 | 41245072 | BRCA1 | NM_007294.3 | c.2475del      | p.(Asp825fs)        | 0.0000 | 148 | 143 | 0.51 | 474 | 166 | 0.74 | 1.45 | 0.00000 |
| P45  | 17 | 41243455 | BRCA1 | NM_007294.3 | c.4093T>G      | p.(Leu1365Val)      | 0.0000 | 250 | 250 | 0.50 | 513 | 231 | 0.69 | 1.38 | 0.00000 |
| P14  | 17 | 41258504 | BRCA1 | NM_007294.3 | c.181T>G       | p.(Cys61Gly)        | 0.0056 | 190 | 263 | 0.42 | 117 | 45  | 0.72 | 1.71 | 0.00000 |
| P34  | 17 | 41245032 | BRCA1 | NM_007294.3 | c.2515del      | p.(His839fs)        | 0.0000 | 597 | 646 | 0.48 | 352 | 189 | 0.65 | 1.35 | 0.00000 |
| P70  | 17 | 41209079 | BRCA1 | NM_007294.3 | c.5266dup      | p.(Gln1756Profs*74) | 0.0166 | 249 | 281 | 0.47 | 440 | 226 | 0.66 | 1.40 | 0.00000 |
| P61  | 17 | 41215348 | BRCA1 | NM_007294.3 | c.5193+1del    | p.(?)               | 0.0000 | 190 | 222 | 0.46 | 136 | 45  | 0.75 | 1.63 | 0.00000 |
| P72  | 17 | 41209079 | BRCA1 | NM_007294.3 | c.5266dup      | p.(Gln1756Profs*74) | 0.0166 | 470 | 510 | 0.48 | 248 | 117 | 0.68 | 1.42 | 0.00000 |
| P41  | 17 | 41243843 | BRCA1 | NM_007294.3 | c.3700_3704del | p.(Val1234fs)       | 0.0000 | 295 | 375 | 0.44 | 301 | 176 | 0.63 | 1.43 | 0.00000 |
| P13  | 17 | 41258504 | BRCA1 | NM_007294.3 | c.181T>G       | p.(Cys61Gly)        | 0.0056 | 97  | 133 | 0.42 | 54  | 9   | 0.86 | 2.05 | 0.00000 |
| P89  | 13 | 32914174 | BRCA2 | NM_000059.3 | c.5682C>G      | p.(Tyr1894*)        | 0.0000 | 239 | 270 | 0.47 | 725 | 426 | 0.63 | 1.34 | 0.00000 |
| P25  | 17 | 41245927 | BRCA1 | NM_007294.3 | c.1621C>T      | p.(Gln541*)         | 0.0000 | 120 | 130 | 0.48 | 356 | 152 | 0.70 | 1.46 | 0.00000 |
| P86  | 13 | 32913829 | BRCA2 | NM_000059.3 | c.5338del      | p.(Glu1780fs)       | 0.0000 | 120 | 130 | 0.48 | 356 | 153 | 0.70 | 1.46 | 0.00000 |
| P77  | 13 | 32907418 | BRCA2 | NM_000059.3 | c.1805del      | p.(Gly602fs)        | 0.0000 | 377 | 409 | 0.48 | 208 | 102 | 0.67 | 1.40 | 0.00000 |
| P78  | 13 | 32910889 | BRCA2 | NM_000059.3 | c.2399dup      | p.(Asn801fs)        | 0.0000 | 189 | 231 | 0.45 | 257 | 139 | 0.65 | 1.44 | 0.00000 |
| P22  | 17 | 41246432 | BRCA1 | NM_007294.3 | c.1116G>A      | p.(Trp372*)         | 0.0000 | 314 | 327 | 0.49 | 140 | 55  | 0.72 | 1.47 | 0.00000 |
| P87  | 13 | 32913987 | BRCA2 | NM_000059.3 | c.5496dup      | p.(Asn1833fs)       | 0.0000 | 208 | 225 | 0.48 | 104 | 37  | 0.74 | 1.54 | 0.00000 |
| P46  | 17 | 41234567 | BRCA1 | NM_007294.3 | c.4210del      | p.(Leu1404fs)       | 0.0000 | 425 | 442 | 0.49 | 319 | 179 | 0.64 | 1.31 | 0.00000 |
| P97  | 13 | 32972315 | BRCA2 | NM_000059.3 | c.9666del      | p.(Cys3222fs)       | 0.0018 | 302 | 302 | 0.50 | 154 | 66  | 0.70 | 1.40 | 0.00000 |
| P62  | 17 | 41209079 | BRCA1 | NM_007294.3 | c.5266dup      | p.(Gln1756Profs*74) | 0.0166 | 113 | 138 | 0.45 | 163 | 80  | 0.67 | 1.49 | 0.00000 |
| P56  | 17 | 41219625 | BRCA1 | NM_007294.3 | c.5074G>C      | p.(Asp1692His)      | 0.0018 | 213 | 174 | 0.55 | 123 | 37  | 0.77 | 1.40 | 0.00000 |
| P11  | 17 | 41276044 | BRCA1 | NM_007294.3 | c.68_69del     | p.(Glu23fs)         | 0.0406 | 148 | 148 | 0.50 | 137 | 53  | 0.72 | 1.44 | 0.00000 |
| P474 | 17 | 41245861 | BRCA1 | NM_007294.3 | c.1687C>T      | p.(Gln563*)         | 0.0074 | 382 | 397 | 0.49 | 383 | 235 | 0.62 | 1.27 | 0.00000 |

|      |    |          |       |             |                    |                     |        |     |     |      |     |     |      |      |         |
|------|----|----------|-------|-------------|--------------------|---------------------|--------|-----|-----|------|-----|-----|------|------|---------|
| P15  | 17 | 41258504 | BRCA1 | NM_007294.3 | c.181T>G           | p.(Cys61Gly)        | 0.0000 | 102 | 111 | 0.48 | 440 | 226 | 0.66 | 1.38 | 0.00001 |
| P38  | 17 | 41244056 | BRCA1 | NM_007294.3 | c.3481_3491del     | p.(Glu1161fs)       | 0.0000 | 85  | 146 | 0.37 | 653 | 579 | 0.53 | 1.43 | 0.00002 |
| P85  | 13 | 32913457 | BRCA2 | NM_000059.3 | c.4965C>G          | p.(Tyr1655*)        | 0.0000 | 275 | 253 | 0.52 | 419 | 226 | 0.65 | 1.25 | 0.00003 |
| P12  | 17 | 41276047 | BRCA1 | NM_007294.3 | c.66dup            | p.(Glu23fs)         | 0.0000 | 87  | 84  | 0.51 | 153 | 57  | 0.73 | 1.43 | 0.00004 |
| P49  | 17 | 41223242 | BRCA1 | NM_007294.3 | c.4689C>G          | p.(Tyr1563*)        | 0.0000 | 264 | 335 | 0.44 | 310 | 234 | 0.57 | 1.30 | 0.00005 |
| P76  | 13 | 32907111 | BRCA2 | NM_000059.3 | c.1499del          | p.(Gly500fs)        | 0.0000 | 175 | 197 | 0.47 | 114 | 56  | 0.67 | 1.43 | 0.00005 |
| P69  | 17 | 41209079 | BRCA1 | NM_007294.3 | c.5266dup          | p.(Gln1756Profs*74) | 0.0166 | 105 | 145 | 0.42 | 160 | 102 | 0.61 | 1.45 | 0.00006 |
| P52  | 17 | 41222997 | BRCA1 | NM_007294.3 | c.4932_4933dup     | p.(Arg1645Lysfs*14) | 0.0000 | 120 | 130 | 0.48 | 437 | 257 | 0.63 | 1.31 | 0.00014 |
| P75  | 17 | 41197784 | BRCA1 | NM_007294.3 | c.5503C>T          | p.(Arg1835*)        | 0.0000 | 406 | 345 | 0.54 | 315 | 170 | 0.65 | 1.20 | 0.00045 |
| P28  | 17 | 41245670 | BRCA1 | NM_007294.3 | c.1874_1877dup     | p.(Val627fs)        | 0.0000 | 113 | 138 | 0.45 | 271 | 188 | 0.59 | 1.31 | 0.00082 |
| P20  | 17 | 41256985 | BRCA1 | NM_007294.3 | c.213-12A>G        | p.(?)               | 0.0000 | 112 | 137 | 0.45 | 57  | 27  | 0.68 | 1.51 | 0.00106 |
| P66  | 17 | 41209079 | BRCA1 | NM_007294.3 | c.5266dup          | p.(Gln1756Profs*74) | 0.0166 | 517 | 584 | 0.47 | 423 | 360 | 0.54 | 1.15 | 0.00743 |
| P93  | 13 | 32920978 | BRCA2 | NM_000059.3 | c.6952C>T          | p.(Arg2318*)        | 0.0000 | 163 | 225 | 0.42 | 386 | 370 | 0.51 | 1.21 | 0.01077 |
| P74  | 17 | 41199683 | BRCA1 | NM_007294.3 | c.5444G>A          | p.(Trp1815*)        | 0.0000 | 236 | 245 | 0.49 | 396 | 298 | 0.57 | 1.16 | 0.01927 |
| P36  | 17 | 41244439 | BRCA1 | NM_007294.3 | c.3108dup          | p.(Lys1037fs)       | 0.0000 | 117 | 131 | 0.47 | 402 | 304 | 0.57 | 1.21 | 0.02414 |
| P47  | 17 | 41234556 | BRCA1 | NM_007294.3 | c.4222C>T          | p.(Gln1408*)        | 0.0000 | 231 | 261 | 0.47 | 461 | 393 | 0.54 | 1.15 | 0.03756 |
| P64  | 17 | 41209079 | BRCA1 | NM_007294.3 | c.5266dup          | p.(Gln1756Profs*74) | 0.0166 | 222 | 282 | 0.44 | 319 | 306 | 0.51 | 1.16 | 0.04923 |
| P35  | 17 | 41244526 | BRCA1 | NM_007294.3 | c.3018_3021del     | p.(His1006fs)       | 0.0000 | 290 | 355 | 0.45 | 243 | 233 | 0.51 | 1.13 | 0.11470 |
| P81  | 13 | 32912337 | BRCA2 | NM_000059.3 | c.3847_3848del     | p.(Val1283fs)       | 0.0225 | 294 | 294 | 0.50 | 198 | 155 | 0.56 | 1.12 | 0.19348 |
| P58  | 17 | 41215947 | BRCA1 | NM_007294.3 | c.5096G>A          | p.(Arg1699Gln)      | 0.0056 | 258 | 229 | 0.53 | 125 | 84  | 0.60 | 1.13 | 0.27217 |
| P478 | 13 | 32914209 | BRCA2 | NM_000059.3 | c.5722_5723del     | p.(Leu1908fs)       | 0.0000 | 390 | 422 | 0.48 | 245 | 311 | 0.44 | 0.92 | 0.35063 |
| P477 | 13 | 32911371 | BRCA2 | NM_000059.3 | c.2880del          | p.(Lys960fs)        | 0.0000 | 185 | 209 | 0.47 | 58  | 87  | 0.40 | 0.85 | 0.39229 |
| P71  | 17 | 41209079 | BRCA1 | NM_007294.3 | c.5266dup          | p.(Gln1756Profs*74) | 0.0166 | 277 | 338 | 0.45 | 245 | 256 | 0.49 | 1.09 | 0.45857 |
| P23  | 17 | 41246420 | BRCA1 | NM_007294.3 | c.1127del          | p.(Asn376fs)        | 0.0000 | 548 | 643 | 0.46 | 131 | 131 | 0.50 | 1.09 | 0.54472 |
| P55  | 17 | 41222948 | BRCA1 | NM_007294.3 | c.4964_4982del     | p.(Ser1655Tyrfs*16) | 0.0018 | 132 | 268 | 0.33 | 169 | 393 | 0.30 | 0.91 | 0.76483 |
| P475 | 17 | 41243788 | BRCA1 | NM_007294.3 | c.3756_3759del     | p.(Ser1253fs)       | 0.0000 | 447 | 504 | 0.47 | 411 | 427 | 0.49 | 1.04 | 0.83360 |
| P37  | 13 | 32914758 | BRCA2 | NM_000059.3 | c.6267_6269delinsC | p.(Glu2089Aspfs*2)  | 0.0000 | 131 | 213 | 0.38 | 238 | 342 | 0.41 | 1.08 | 0.85183 |
| P88  | 13 | 32914137 | BRCA2 | NM_000059.3 | c.5645C>A          | p.(Ser1882*)        | 0.0037 | 116 | 126 | 0.48 | 458 | 440 | 0.51 | 1.06 | 0.88660 |
| P80  | 13 | 32911755 | BRCA2 | NM_000059.3 | c.3264dup          | p.(Gln1089fs)       | 0.0000 | 241 | 231 | 0.51 | 196 | 205 | 0.49 | 0.96 | 1.10306 |

|                         |    |          |       |             |                       |                                |        |     |     |      |     |     |      |      |         |
|-------------------------|----|----------|-------|-------------|-----------------------|--------------------------------|--------|-----|-----|------|-----|-----|------|------|---------|
| P43                     | 17 | 41243788 | BRCA1 | NM_007294.3 | c.3756_3759del        | p.(Ser1253fs)                  | 0.0000 | 108 | 143 | 0.43 | 302 | 369 | 0.45 | 1.05 | 1.29954 |
| P39                     | 17 | 41244056 | BRCA1 | NM_007294.3 | c.3481_3491del        | p.(Glu1161fs)                  | 0.0000 | 196 | 307 | 0.39 | 350 | 571 | 0.38 | 0.97 | 1.41640 |
| P83                     | 13 | 32912940 | BRCA2 | NM_000059.3 | c.4449del             | p.(Asp1484fs)                  | 0.0000 | 388 | 438 | 0.47 | 118 | 134 | 0.47 | 1.00 | 1.84878 |
| <b>Class 3 variants</b> |    |          |       |             |                       |                                |        |     |     |      |     |     |      |      |         |
| P241                    | 17 | 41245975 | BRCA1 | NM_007294.3 | c.1573G>A             | p.(Val525Ile)                  | 0.0000 | 420 | 456 | 0.48 | 51  | 463 | 0.10 | 0.21 | 0.00000 |
| P338                    | 17 | 41244094 | BRCA1 | NM_007294.3 | c.3454G>A             | p.(Asp1152Asn)                 | 0.0000 | 378 | 444 | 0.46 | 74  | 452 | 0.14 | 0.30 | 0.00000 |
| P322                    | 13 | 32911181 | BRCA2 | NM_000059.3 | c.2689G>A             | p.(Glu897Lys)                  | 0.0000 | 124 | 124 | 0.50 | 475 | 47  | 0.91 | 1.82 | 0.00000 |
| P404                    | 13 | 32914392 | BRCA2 | NM_000059.3 | c.5900A>G             | p.(Lys1967Arg)                 | 0.0000 | 232 | 284 | 0.45 | 528 | 149 | 0.78 | 1.73 | 0.00000 |
| P271                    | 17 | 41209133 | BRCA1 | NM_007294.3 | c.5213G>A             | p.(Gly1738Glu)                 | 0.0000 | 218 | 255 | 0.46 | 297 | 56  | 0.84 | 1.83 | 0.00000 |
| P338                    | 13 | 32936722 | BRCA2 | NM_000059.3 | c.7868A>G             | p.(His2623Arg)                 | 0.0000 | 343 | 316 | 0.52 | 340 | 70  | 0.83 | 1.60 | 0.00000 |
| P188                    | 17 | 41215379 | BRCA1 | NM_007294.3 | c.5161_5163del        | p.(Gln1721del)                 | 0.0000 | 101 | 134 | 0.43 | 298 | 66  | 0.82 | 1.91 | 0.00000 |
| P127                    | 13 | 32907520 | BRCA2 | NM_000059.3 | c.1905T>G             | p.(Asp635Glu)                  | 0.0000 | 130 | 165 | 0.44 | 231 | 77  | 0.75 | 1.70 | 0.00000 |
| P98                     | 17 | 41244094 | BRCA1 | NM_007294.3 | c.3454G>A             | p.(Asp1152Asn)                 | 0.0000 | 471 | 600 | 0.44 | 16  | 95  | 0.14 | 0.32 | 0.00000 |
| P156                    | 13 | 32900240 | BRCA2 | NM_000059.3 | c.433_435del          | p.(Val145del)                  | 0.0018 | 162 | 182 | 0.47 | 351 | 165 | 0.68 | 1.45 | 0.00000 |
| P227                    | 13 | 32953474 | BRCA2 | NM_000059.3 | c.8775G>C             | p.(Gln2925His)                 | 0.0000 | 228 | 238 | 0.49 | 324 | 153 | 0.68 | 1.39 | 0.00000 |
| P245                    | 17 | 41215387 | BRCA1 | NM_007294.3 | c.5156T>G             | p.(Val1719Gly)                 | 0.0000 | 120 | 130 | 0.48 | 281 | 145 | 0.66 | 1.38 | 0.00002 |
| P146                    | 17 | 41244466 | BRCA1 | NM_007294.3 | c.3082C>T             | p.(Arg1028Cys)                 | 0.0037 | 117 | 132 | 0.47 | 739 | 473 | 0.61 | 1.30 | 0.00016 |
| P237                    | 13 | 32930614 | BRCA2 | NM_000059.3 | c.7491_7493del        | p.(Lys2498del)                 | 0.0000 | 179 | 258 | 0.41 | 123 | 302 | 0.29 | 0.71 | 0.00076 |
| P171                    | 13 | 32918701 | BRCA2 | NM_000059.3 | c.6848C>T             | p.(Pro2283Leu)                 | 0.0000 | 191 | 263 | 0.42 | 200 | 184 | 0.52 | 1.24 | 0.01158 |
| P241                    | 13 | 32972525 | BRCA2 | NM_000059.3 | c.9875C>T             | p.(Pro3292Leu)                 | 0.0018 | 521 | 521 | 0.50 | 250 | 181 | 0.58 | 1.16 | 0.01551 |
| P173                    | 13 | 32912357 | BRCA2 | NM_000059.3 | c.3865A>G             | p.(Lys1289Glu)                 | 0.0000 | 300 | 366 | 0.45 | 479 | 479 | 0.50 | 1.11 | 0.13594 |
| P120                    | 13 | 32911794 | BRCA2 | NM_000059.3 | c.3302A>G             | p.(His1101Arg)                 | 0.0000 | 136 | 112 | 0.55 | 135 | 82  | 0.62 | 1.13 | 0.26637 |
| P487                    | 17 | 41245699 | BRCA1 | NM_007294.3 | c.1846_1848del        | p.(Ser616del)                  | 0.0018 | 104 | 143 | 0.42 | 269 | 440 | 0.38 | 0.90 | 0.56528 |
| P415                    | 13 | 32953965 | BRCA2 | NM_000059.3 | c.9032T>C             | p.(Leu3011Pro)                 | 0.0000 | 198 | 190 | 0.51 | 88  | 70  | 0.56 | 1.10 | 0.73957 |
| P52                     | 13 | 32915105 | BRCA2 | NM_000059.3 | c.6613G>A             | p.(Val2205Met)                 | 0.0056 | 118 | 122 | 0.49 | 263 | 252 | 0.51 | 1.04 | 1.27614 |
| P386                    | 17 | 41228555 | BRCA1 | NM_007294.3 | c.4434G>T             | p.(Glu1478Asp)                 | 0.0000 | 282 | 306 | 0.48 | 323 | 336 | 0.49 | 1.02 | 1.41127 |
| P453                    | 17 | 41226518 | BRCA1 | NM_007294.3 | c.4505C>A             | p.(Pro1502Gln)                 | 0.0000 | 480 | 480 | 0.50 | 198 | 206 | 0.49 | 0.98 | 1.45329 |
| P167                    | 13 | 32906831 | BRCA2 | NM_000059.3 | c.1216_1219delinsACCG | p.(Ala406_Gln407del insThrGlu) | 0.0018 | 322 | 349 | 0.48 | 340 | 369 | 0.48 | 1.00 | 1.82212 |

| Class 1/2 variants |    |          |       |             |           |                |        |     |     |      |     |      |      |      |         |
|--------------------|----|----------|-------|-------------|-----------|----------------|--------|-----|-----|------|-----|------|------|------|---------|
| P274               | 17 | 41245027 | BRCA1 | NM_007294.3 | c.2521C>T | p.(Arg841Trp)  | 0.2099 | 506 | 506 | 0.50 | 201 | 1237 | 0.14 | 0.28 | 0.00000 |
| P218               | 17 | 41226488 | BRCA1 | NM_007294.3 | c.4535G>T | p.(Ser1512Ile) | 0.3129 | 492 | 555 | 0.47 | 12  | 404  | 0.03 | 0.06 | 0.00000 |
| P342               | 17 | 41243509 | BRCA1 | NM_007294.3 | c.4039A>G | p.(Arg1347Gly) | 0.6424 | 222 | 231 | 0.49 | 649 | 49   | 0.93 | 1.90 | 0.00000 |
| P211               | 13 | 32913062 | BRCA2 | NM_000059.3 | c.4570T>G | p.(Phe1524Val) | 0.0018 | 443 | 500 | 0.47 | 59  | 586  | 0.09 | 0.19 | 0.00000 |
| P221               | 17 | 41246092 | BRCA1 | NM_007294.3 | c.1456T>C | p.(Phe486Leu)  | 0.0294 | 289 | 368 | 0.44 | 388 | 48   | 0.89 | 2.02 | 0.00000 |
| P221               | 17 | 41245900 | BRCA1 | NM_007294.3 | c.1648A>C | p.(Asn550His)  | 0.0295 | 358 | 358 | 0.50 | 532 | 66   | 0.89 | 1.78 | 0.00000 |
| P121               | 13 | 32937521 | BRCA2 | NM_000059.3 | c.8182G>A | p.(Val2728Ile) | 0.3257 | 588 | 522 | 0.53 | 186 | 742  | 0.20 | 0.38 | 0.00000 |
| P211               | 13 | 32914592 | BRCA2 | NM_000059.3 | c.6100C>T | p.(Arg2034Cys) | 0.4810 | 419 | 419 | 0.50 | 482 | 79   | 0.86 | 1.72 | 0.00000 |
| P243               | 13 | 32914592 | BRCA2 | NM_000059.3 | c.6100C>T | p.(Arg2034Cys) | 0.4810 | 304 | 329 | 0.48 | 652 | 134  | 0.83 | 1.73 | 0.00000 |
| P384               | 13 | 32937488 | BRCA2 | NM_000059.3 | c.8149G>T | p.(Ala2717Ser) | 0.1675 | 337 | 337 | 0.50 | 719 | 147  | 0.83 | 1.66 | 0.00000 |
| P243               | 17 | 41246812 | BRCA1 | NM_007294.3 | c.736T>G  | p.(Leu246Val)  | 0.0394 | 326 | 313 | 0.51 | 124 | 606  | 0.17 | 0.33 | 0.00000 |
| P283               | 13 | 32930673 | BRCA2 | NM_000059.3 | c.7544C>T | p.(Thr2515Ile) | 0.1012 | 466 | 504 | 0.48 | 60  | 401  | 0.13 | 0.27 | 0.00000 |
| P221               | 17 | 41251803 | BRCA1 | NM_007294.3 | c.536A>G  | p.(Tyr179Cys)  | 0.0294 | 265 | 265 | 0.50 | 431 | 64   | 0.87 | 1.74 | 0.00000 |
| P400               | 17 | 41226488 | BRCA1 | NM_007294.3 | c.4535G>T | p.(Ser1512Ile) | 0.3129 | 424 | 441 | 0.49 | 739 | 234  | 0.76 | 1.55 | 0.00000 |
| P196               | 17 | 41243512 | BRCA1 | NM_007294.3 | c.4036G>A | p.(Glu1346Lys) | 0.0074 | 225 | 234 | 0.49 | 105 | 551  | 0.16 | 0.33 | 0.00000 |
| P412               | 17 | 41246812 | BRCA1 | NM_007294.3 | c.736T>G  | p.(Leu246Val)  | 0.0394 | 340 | 340 | 0.50 | 318 | 61   | 0.84 | 1.68 | 0.00000 |
| P187               | 13 | 32906593 | BRCA2 | NM_000059.3 | c.978C>A  | p.(Ser326Arg)  | 0.1039 | 271 | 282 | 0.49 | 502 | 125  | 0.80 | 1.63 | 0.00000 |
| P215               | 17 | 41244246 | BRCA1 | NM_007294.3 | c.3302G>A | p.(Ser1101Asn) | 0.0184 | 396 | 396 | 0.50 | 29  | 211  | 0.12 | 0.24 | 0.00000 |
| P109               | 13 | 32893207 | BRCA2 | NM_000059.3 | c.68-7T>A | p.(?)          | 0.2918 | 130 | 102 | 0.56 | 17  | 188  | 0.08 | 0.15 | 0.00000 |
| P1                 | 13 | 32914815 | BRCA2 | NM_000059.3 | c.6323G>A | p.(Arg2108His) | 0.0818 | 230 | 230 | 0.50 | 189 | 709  | 0.21 | 0.42 | 0.00000 |
| P367               | 13 | 32953550 | BRCA2 | NM_000059.3 | c.8851G>A | p.(Ala2951Thr) | 0.4400 | 113 | 138 | 0.45 | 210 | 26   | 0.89 | 1.98 | 0.00000 |
| P121               | 13 | 32907000 | BRCA2 | NM_000059.3 | c.1385A>G | p.(Glu462Gly)  | 0.0407 | 366 | 429 | 0.46 | 464 | 172  | 0.73 | 1.59 | 0.00000 |
| P405               | 13 | 32937521 | BRCA2 | NM_000059.3 | c.8182G>A | p.(Val2728Ile) | 0.3257 | 236 | 245 | 0.49 | 501 | 141  | 0.78 | 1.59 | 0.00000 |
| P3                 | 13 | 32914592 | BRCA2 | NM_000059.3 | c.6100C>T | p.(Arg2034Cys) | 0.4810 | 287 | 336 | 0.46 | 420 | 147  | 0.74 | 1.61 | 0.00000 |
| P354               | 13 | 32953604 | BRCA2 | NM_000059.3 | c.8905G>A | p.(Val2969Met) | 0.0663 | 125 | 125 | 0.50 | 319 | 52   | 0.86 | 1.72 | 0.00000 |
| P168               | 13 | 32914592 | BRCA2 | NM_000059.3 | c.6100C>T | p.(Arg2034Cys) | 0.4810 | 258 | 268 | 0.49 | 327 | 87   | 0.79 | 1.61 | 0.00000 |
| P206               | 13 | 32972626 | BRCA2 | NM_000059.3 | c.9976A>T | p.(Lys3326*)   | 0.8407 | 432 | 416 | 0.51 | 138 | 394  | 0.26 | 0.51 | 0.00000 |
| P329               | 13 | 32913062 | BRCA2 | NM_000059.3 | c.4570T>G | p.(Phe1524Val) | 0.0018 | 239 | 259 | 0.48 | 64  | 272  | 0.19 | 0.40 | 0.00000 |



|      |    |          |       |             |           |                |        |     |     |      |     |     |      |      |         |
|------|----|----------|-------|-------------|-----------|----------------|--------|-----|-----|------|-----|-----|------|------|---------|
| P239 | 13 | 32914277 | BRCA2 | NM_000059.3 | c.5785A>G | p.(Ile1929Val) | 0.0313 | 420 | 438 | 0.49 | 245 | 599 | 0.29 | 0.59 | 0.00000 |
| P362 | 13 | 32914839 | BRCA2 | NM_000059.3 | c.6347A>G | p.(His2116Arg) | 0.0261 | 105 | 110 | 0.49 | 103 | 11  | 0.90 | 1.84 | 0.00000 |
| P333 | 13 | 32945172 | BRCA2 | NM_000059.3 | c.8567A>C | p.(Glu2856Ala) | 0.1326 | 219 | 258 | 0.46 | 66  | 266 | 0.20 | 0.43 | 0.00000 |
| P367 | 17 | 41249263 | BRCA1 | NM_007294.3 | c.591C>T  | p.(Cys197Cys)  | 0.1789 | 83  | 94  | 0.47 | 97  | 11  | 0.90 | 1.91 | 0.00000 |
| P364 | 13 | 32953550 | BRCA2 | NM_000059.3 | c.8851G>A | p.(Ala2951Thr) | 0.4400 | 207 | 298 | 0.41 | 114 | 458 | 0.20 | 0.49 | 0.00000 |
| P68  | 13 | 32953549 | BRCA2 | NM_000059.3 | c.8850G>T | p.(Lys2950Asn) | 0.0718 | 110 | 140 | 0.44 | 24  | 172 | 0.12 | 0.27 | 0.00000 |
| P4   | 13 | 32914592 | BRCA2 | NM_000059.3 | c.6100C>T | p.(Arg2034Cys) | 0.4810 | 121 | 125 | 0.49 | 261 | 82  | 0.76 | 1.55 | 0.00000 |
| P330 | 17 | 41226488 | BRCA1 | NM_007294.3 | c.4535G>T | p.(Ser1512Ile) | 0.3129 | 455 | 514 | 0.47 | 366 | 206 | 0.64 | 1.36 | 0.00000 |
| P393 | 13 | 32953549 | BRCA2 | NM_000059.3 | c.8850G>T | p.(Lys2950Asn) | 0.0718 | 212 | 259 | 0.45 | 147 | 420 | 0.26 | 0.58 | 0.00000 |
| P253 | 13 | 32906593 | BRCA2 | NM_000059.3 | c.978C>A  | p.(Ser326Arg)  | 0.1039 | 234 | 225 | 0.51 | 304 | 118 | 0.72 | 1.41 | 0.00000 |
| P128 | 17 | 41243509 | BRCA1 | NM_007294.3 | c.4039A>G | p.(Arg1347Gly) | 0.6424 | 411 | 446 | 0.48 | 138 | 323 | 0.30 | 0.63 | 0.00000 |
| P52  | 17 | 41243509 | BRCA1 | NM_007294.3 | c.4039A>G | p.(Arg1347Gly) | 0.6424 | 103 | 142 | 0.42 | 387 | 200 | 0.66 | 1.57 | 0.00000 |
| P53  | 17 | 41243509 | BRCA1 | NM_007294.3 | c.4039A>G | p.(Arg1347Gly) | 0.6424 | 350 | 311 | 0.53 | 266 | 99  | 0.73 | 1.38 | 0.00000 |
| P22  | 13 | 32937521 | BRCA2 | NM_000059.3 | c.8182G>A | p.(Val2728Ile) | 0.3257 | 269 | 303 | 0.47 | 120 | 45  | 0.73 | 1.55 | 0.00000 |
| P20  | 17 | 41243509 | BRCA1 | NM_007294.3 | c.4039A>G | p.(Arg1347Gly) | 0.6424 | 120 | 130 | 0.48 | 102 | 32  | 0.76 | 1.58 | 0.00000 |
| P107 | 13 | 32937488 | BRCA2 | NM_000059.3 | c.8149G>T | p.(Ala2717Ser) | 0.1675 | 335 | 322 | 0.51 | 263 | 129 | 0.67 | 1.31 | 0.00000 |
| P315 | 13 | 32972626 | BRCA2 | NM_000059.3 | c.9976A>T | p.(Lys3326*)   | 0.8407 | 216 | 224 | 0.49 | 49  | 131 | 0.27 | 0.55 | 0.00000 |
| P91  | 13 | 32906593 | BRCA2 | NM_000059.3 | c.978C>A  | p.(Ser326Arg)  | 0.1039 | 224 | 263 | 0.46 | 172 | 383 | 0.31 | 0.67 | 0.00000 |
| P154 | 13 | 32930673 | BRCA2 | NM_000059.3 | c.7544C>T | p.(Thr2515Ile) | 0.1012 | 352 | 447 | 0.44 | 139 | 85  | 0.62 | 1.41 | 0.00001 |
| P481 | 13 | 32972626 | BRCA2 | NM_000059.3 | c.9976A>T | p.(Lys3326*)   | 0.8407 | 310 | 310 | 0.50 | 126 | 65  | 0.66 | 1.32 | 0.00037 |
| P472 | 13 | 32937521 | BRCA2 | NM_000059.3 | c.8182G>A | p.(Val2728Ile) | 0.3257 | 211 | 219 | 0.49 | 433 | 676 | 0.39 | 0.80 | 0.00122 |
| P54  | 13 | 32907129 | BRCA2 | NM_000059.3 | c.1514T>C | p.(Ile505Thr)  | 0.1079 | 198 | 190 | 0.51 | 354 | 217 | 0.62 | 1.22 | 0.00240 |
| P352 | 13 | 32945172 | BRCA2 | NM_000059.3 | c.8567A>C | p.(Glu2856Ala) | 0.1326 | 125 | 125 | 0.50 | 134 | 72  | 0.65 | 1.30 | 0.00350 |
| P475 | 13 | 32912750 | BRCA2 | NM_000059.3 | c.4258G>T | p.(Asp1420Tyr) | 0.8179 | 402 | 387 | 0.51 | 353 | 468 | 0.43 | 0.84 | 0.00382 |
| P445 | 13 | 32953550 | BRCA2 | NM_000059.3 | c.8851G>A | p.(Ala2951Thr) | 0.4400 | 106 | 125 | 0.46 | 402 | 291 | 0.58 | 1.26 | 0.00463 |
| P398 | 17 | 41243509 | BRCA1 | NM_007294.3 | c.4039A>G | p.(Arg1347Gly) | 0.6424 | 215 | 252 | 0.46 | 174 | 136 | 0.56 | 1.22 | 0.01750 |
| P317 | 17 | 41249263 | BRCA1 | NM_007294.3 | c.591C>T  | p.(Cys197Cys)  | 0.1789 | 108 | 108 | 0.50 | 49  | 23  | 0.68 | 1.36 | 0.02391 |
| P300 | 13 | 32929007 | BRCA2 | NM_000059.3 | c.7017G>C | p.(Lys2339Asn) | 0.0018 | 120 | 111 | 0.52 | 88  | 133 | 0.40 | 0.77 | 0.02762 |
| P449 | 13 | 32953550 | BRCA2 | NM_000059.3 | c.8851G>A | p.(Ala2951Thr) | 0.4400 | 231 | 283 | 0.45 | 141 | 130 | 0.52 | 1.16 | 0.14920 |

|      |    |          |       |             |            |                |        |     |     |      |     |     |      |      |         |
|------|----|----------|-------|-------------|------------|----------------|--------|-----|-----|------|-----|-----|------|------|---------|
| P477 | 13 | 32945172 | BRCA2 | NM_000059.3 | c.8567A>C  | p.(Glu2856Ala) | 0.1326 | 189 | 196 | 0.49 | 78  | 113 | 0.41 | 0.84 | 0.15434 |
| P69  | 13 | 32930673 | BRCA2 | NM_000059.3 | c.7544C>T  | p.(Thr2515Ile) | 0.1012 | 118 | 133 | 0.47 | 78  | 61  | 0.56 | 1.19 | 0.26949 |
| P213 | 13 | 32972626 | BRCA2 | NM_000059.3 | c.9976A>T  | p.(Lys3326*)   | 0.8407 | 382 | 352 | 0.52 | 98  | 116 | 0.46 | 0.88 | 0.28469 |
| P465 | 13 | 32972695 | BRCA2 | NM_000059.3 | c.10045A>G | p.(Thr3349Ala) | 0.0018 | 340 | 301 | 0.53 | 413 | 311 | 0.57 | 1.08 | 0.33264 |
| P264 | 13 | 32906593 | BRCA2 | NM_000059.3 | c.978C>A   | p.(Ser326Arg)  | 0.1039 | 126 | 142 | 0.47 | 154 | 222 | 0.41 | 0.87 | 0.34299 |
| P62  | 13 | 32937521 | BRCA2 | NM_000059.3 | c.8182G>A  | p.(Val2728Ile) | 0.3257 | 115 | 129 | 0.47 | 135 | 115 | 0.54 | 1.15 | 0.34833 |
| P434 | 13 | 32913562 | BRCA2 | NM_000059.3 | c.5070A>C  | p.(Lys1690Asn) | 0.0225 | 394 | 410 | 0.49 | 266 | 325 | 0.45 | 0.92 | 0.36327 |
| P246 | 13 | 32912750 | BRCA2 | NM_000059.3 | c.4258G>T  | p.(Asp1420Tyr) | 0.8179 | 232 | 222 | 0.51 | 324 | 366 | 0.47 | 0.92 | 0.41658 |
| P413 | 13 | 32912750 | BRCA2 | NM_000059.3 | c.4258G>T  | p.(Asp1420Tyr) | 0.8179 | 457 | 457 | 0.50 | 241 | 206 | 0.54 | 1.08 | 0.41589 |
| P300 | 13 | 32929309 | BRCA2 | NM_000059.3 | c.7319A>G  | p.(His2440Arg) | 0.0018 | 124 | 110 | 0.53 | 137 | 155 | 0.47 | 0.89 | 0.42197 |
| P392 | 13 | 32906766 | BRCA2 | NM_000059.3 | c.1151C>T  | p.(Ser384Phe)  | 0.1049 | 285 | 309 | 0.48 | 417 | 510 | 0.45 | 0.94 | 0.58790 |
| P11  | 13 | 32907407 | BRCA2 | NM_000059.3 | c.1792A>G  | p.(Thr598Ala)  | 0.3706 | 177 | 163 | 0.52 | 66  | 77  | 0.46 | 0.88 | 0.59444 |
| P44  | 13 | 32912750 | BRCA2 | NM_000059.3 | c.4258G>T  | p.(Asp1420Tyr) | 0.8179 | 269 | 269 | 0.50 | 335 | 377 | 0.47 | 0.94 | 0.65887 |
| P429 | 13 | 32914592 | BRCA2 | NM_000059.3 | c.6100C>T  | p.(Arg2034Cys) | 0.4810 | 205 | 240 | 0.46 | 253 | 336 | 0.43 | 0.93 | 0.73863 |
| P181 | 13 | 32953550 | BRCA2 | NM_000059.3 | c.8851G>A  | p.(Ala2951Thr) | 0.4400 | 257 | 290 | 0.47 | 698 | 726 | 0.49 | 1.04 | 0.88200 |
| P157 | 13 | 32907407 | BRCA2 | NM_000059.3 | c.1792A>G  | p.(Thr598Ala)  | 0.3706 | 105 | 128 | 0.45 | 315 | 341 | 0.48 | 1.07 | 0.92371 |
| P236 | 13 | 32972626 | BRCA2 | NM_000059.3 | c.9976A>T  | p.(Lys3326*)   | 0.8407 | 398 | 383 | 0.51 | 292 | 304 | 0.49 | 0.96 | 0.98840 |
| P108 | 13 | 32906766 | BRCA2 | NM_000059.3 | c.1151C>T  | p.(Ser384Phe)  | 0.1049 | 375 | 423 | 0.47 | 299 | 311 | 0.49 | 1.04 | 0.99168 |
| P327 | 13 | 32953550 | BRCA2 | NM_000059.3 | c.8851G>A  | p.(Ala2951Thr) | 0.4400 | 169 | 191 | 0.47 | 300 | 313 | 0.49 | 1.04 | 1.11608 |
| P310 | 17 | 41219694 | BRCA1 | NM_007294.3 | c.5005G>T  | p.(Ala1669Ser) | 0.0055 | 206 | 297 | 0.41 | 161 | 214 | 0.43 | 1.05 | 1.16985 |
| P135 | 13 | 32907407 | BRCA2 | NM_000059.3 | c.1792A>G  | p.(Thr598Ala)  | 0.3706 | 112 | 112 | 0.50 | 475 | 438 | 0.52 | 1.04 | 1.20733 |
| P324 | 13 | 32912750 | BRCA2 | NM_000059.3 | c.4258G>T  | p.(Asp1420Tyr) | 0.8179 | 123 | 123 | 0.50 | 157 | 145 | 0.52 | 1.04 | 1.31730 |
| P151 | 13 | 32912750 | BRCA2 | NM_000059.3 | c.4258G>T  | p.(Asp1420Tyr) | 0.8179 | 318 | 305 | 0.51 | 566 | 566 | 0.50 | 0.98 | 1.35494 |
| P488 | 13 | 32906766 | BRCA2 | NM_000059.3 | c.1151C>T  | p.(Ser384Phe)  | 0.1049 | 447 | 504 | 0.47 | 259 | 280 | 0.48 | 1.02 | 1.37876 |
| P194 | 13 | 32912007 | BRCA2 | NM_000059.3 | c.3515C>T  | p.(Ser1172Leu) | 0.0975 | 270 | 304 | 0.47 | 551 | 597 | 0.48 | 1.02 | 1.40007 |
| P55  | 13 | 32912750 | BRCA2 | NM_000059.3 | c.4258G>T  | p.(Asp1420Tyr) | 0.8179 | 271 | 241 | 0.53 | 415 | 384 | 0.52 | 0.98 | 1.40524 |
| P196 | 13 | 32937521 | BRCA2 | NM_000059.3 | c.8182G>A  | p.(Val2728Ile) | 0.3257 | 278 | 289 | 0.49 | 395 | 395 | 0.50 | 1.02 | 1.41169 |
| P252 | 13 | 32953550 | BRCA2 | NM_000059.3 | c.8851G>A  | p.(Ala2951Thr) | 0.4400 | 259 | 269 | 0.49 | 201 | 201 | 0.50 | 1.02 | 1.49170 |
| P112 | 13 | 32906593 | BRCA2 | NM_000059.3 | c.978C>A   | p.(Ser326Arg)  | 0.1039 | 225 | 287 | 0.44 | 84  | 103 | 0.45 | 1.02 | 1.62008 |

|      |    |          |       |             |           |                |        |     |     |      |     |     |      |      |         |
|------|----|----------|-------|-------------|-----------|----------------|--------|-----|-----|------|-----|-----|------|------|---------|
| P300 | 13 | 32972380 | BRCA2 | NM_000059.3 | c.9730G>A | p.(Val3244Ile) | 0.0018 | 115 | 134 | 0.46 | 168 | 189 | 0.47 | 1.02 | 1.62179 |
| P430 | 13 | 32953550 | BRCA2 | NM_000059.3 | c.8851G>A | p.(Ala2951Thr) | 0.4400 | 86  | 109 | 0.44 | 141 | 180 | 0.44 | 1.00 | 1.85784 |
| P295 | 13 | 32906766 | BRCA2 | NM_000059.3 | c.1151C>T | p.(Ser384Phe)  | 0.1049 | 203 | 293 | 0.41 | 98  | 140 | 0.41 | 1.00 | 1.83981 |
| P272 | 13 | 32945172 | BRCA2 | NM_000059.3 | c.8567A>C | p.(Glu2856Ala) | 0.1326 | 170 | 185 | 0.48 | 154 | 167 | 0.48 | 1.00 | 1.83092 |

**Supplementary Table 3:** Performance of loss of heterozygosity (LOH)-analyses for the classification of rare germline variants in the *BRCA1* and *BRCA2* genes. Test for pathogenicity is based on the assumption that a significantly increased variant fraction in the tumour predicts pathogenicity. Test for benignity is based on the assumption that a significantly decreased variant fraction in the tumour predicts benignity. \* = calculation was performed using the Haldane-Anscombe correction[1]. PPV = positive predictive value; LR+ = positive likelihood ratio.

|                               | BRCA1/2 (n=184)     | BRCA1 (n=88)        | BRCA2 (n=96)        |
|-------------------------------|---------------------|---------------------|---------------------|
| <b>Test for pathogenicity</b> |                     |                     |                     |
| Sensitivity (95%CI)           | 0.84 (0.75-0.91)    | 0.88 (0.78-0.95)    | 0.73 (0.52-0.88)    |
| Specificity (95%CI)           | 0.63 (0.53-0.73)    | 0.35 (0.15-0.59)    | 0.71 (0.59-0.82)    |
| PPV (95%CI)                   | 0.71 (0.61-0.79)    | 0.82 (0.71-0.90)    | 0.49 (0.32-0.65)    |
| LR+ (95%CI)                   | 2.29 (1.72-3.05)    | 1.36 (0.97-1.89)    | 2.56 (1.65-3.96)    |
| <b>Test for benignity</b>     |                     |                     |                     |
| Sensitivity (95%CI)           | 0.26 (0.17-0.36)    | 0.30 (0.12-0.54)    | 0.24 (0.15-0.36)    |
| Specificity (95%CI)           | 1.00 (0.96-1.00)    | 1.00 (0.95-1.00)    | 1.00 (0.87-1.00)    |
| PPV (95%CI)                   | 1.00 (0.85-1.00)    | 1.00 (0.54-1.00)    | 1.00 (0.80-1.00)    |
| LR+ (95%CI)*                  | 49.07 (3.02-795.93) | 42.71 (2.51-727.20) | 13.31 (0.83-213.68) |

#### Reference:

1. Haldane JB. The estimation and significance of the logarithm of a ratio of frequencies. *Ann Hum Genet* 1956;**20**(4):309-11 doi: 10.1111/j.1469-1809.1955.tb01285.x
